# Supplementary material
Source: PubMed Central journal article supplement (PMC2709462)
Supplement: cvp116_1.pdf [file cvp116_1.pdf]

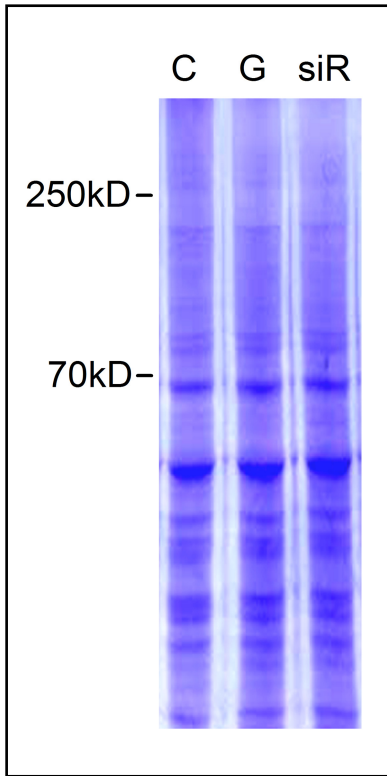

**Supplementary figure.** Coomassie-stained SDS-PAGE gel analysis displaying the lack of effect of readthrough-enhancing reagents on the total protein profile in HEK293 cells. C: control, untreated cells; G: cells treated with G418 (50 µg/ml); siR: cells transfected with the vector expressing siRNA against eRF3a. Method: Total proteins were extracted from HEK293 cells that were treated with the indicated reagents for 48 hrs. The protein samples were then analyzed on a 7% SDS-PAGE gel and then stained with coomassie.
